# Supplementary material for: Electrogenerated chemiluminescence emission from cadmium germanate nanoparticles
Source: Royal Society of Chemistry journal article supplement (doi:10.1039/c5ra15217h), 2015-01-01
Supplement: c5ra15217h1.pdf [file c5ra15217h1.pdf]

## Supporting Information for

# Electrogenerated Chemiluminescence Emissions from Cadmium Germanate Nanoparticles

Ju Li, Yi-Min Fang, Jing Song, Ming-E Wang, Jian-Jun Sun\*

*Ministry of Education Key Laboratory of Analysis and Determination for Food Safety, Fujian Provincial Key Laboratory of Analysis and Detection for Food Safety, College of Chemistry And Chemical Engineering, Fuzhou University, Fuzhou, 350108, China.*

### ESI Figures

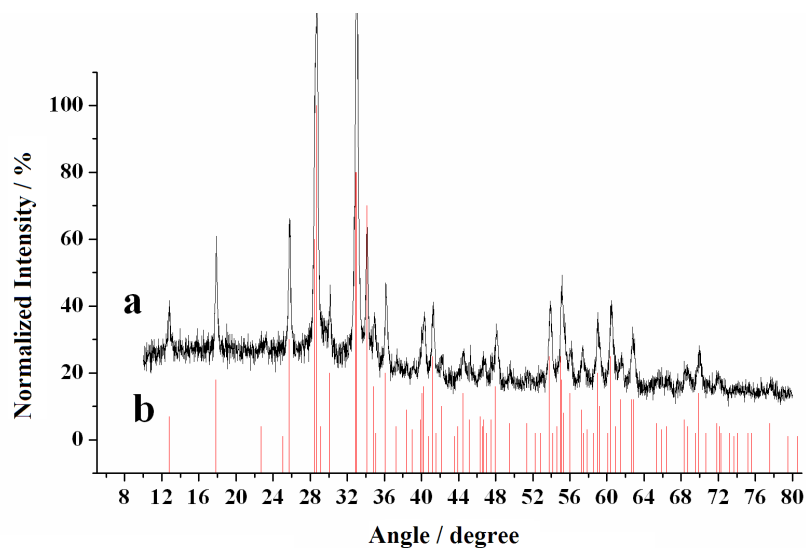

**ESI Figure 1.** (a) XRD pattern of the Cd<sub>2</sub>Ge<sub>2</sub>O<sub>6</sub> samples prepared at 140 °C. (b) The standard XRD pattern of Cd<sub>2</sub>Ge<sub>2</sub>O<sub>6</sub>.

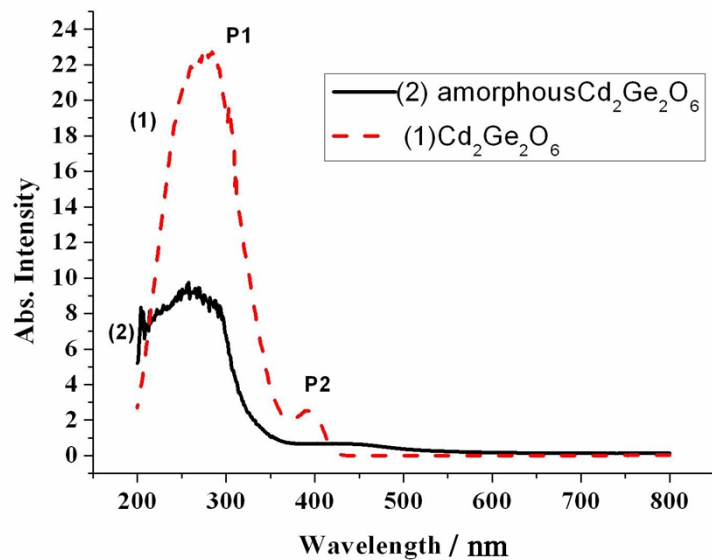

ESI Figure 2. UV-vis absorption of Cd<sub>2</sub>Ge<sub>2</sub>O<sub>6</sub> synthesized at (1) at 140 °C (crystalline) and (2) 90 °C (amorphous).

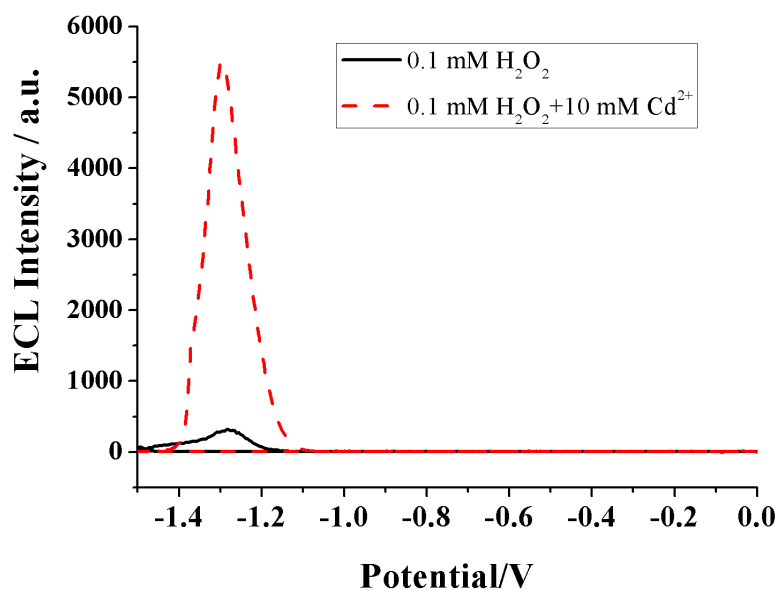

ESI Figure 3. ECL graph of Cd<sub>2</sub>Ge<sub>2</sub>O<sub>6</sub> immersed in different solution: (1) 0.1 mM H<sub>2</sub>O<sub>2</sub> solution. (2) 0.1 mM H<sub>2</sub>O<sub>2</sub>+ 0.1 M CdCl<sub>2</sub> solution. The scanning rate is 20 mV/s.

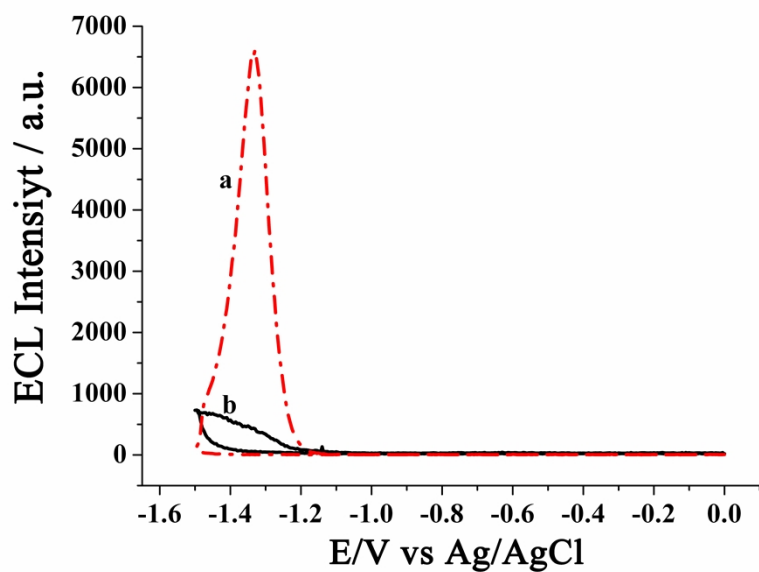

ESI Figure 4. ECL graph of  $\text{Cd}_2\text{Ge}_2\text{O}_6$  immersed in different solution: (1) 0.1 M  $\text{NaClO}_4$  solution. (2) 0.1 M  $\text{NaClO}_4$  + 10 mM  $\text{PO}_4^{3-}$  solution. The scanning rate is 20 mV/s.

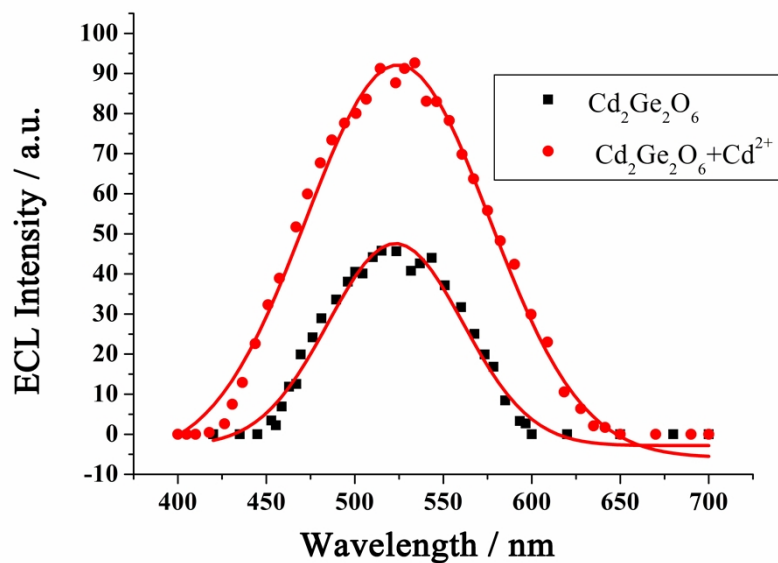

ESI Figure 5. ECL spectrum of  $\text{Cd}_2\text{Ge}_2\text{O}_6$  before and after immersed in 0.1M  $\text{CdCl}_2$  solution.
